# Supplementary material
Source: publisher figshare collection journal article supplement (https://acs.figshare.com/ndownloader/files/4060534)
Supplement: Supplementary file 1 [file 4060534]

  
data_brs4s 
  
_audit_creation_method            SHELXL-97 
_chemical_name_systematic 
; 
 ? 
; 
_chemical_name_common             ? 
_chemical_melting_point           ? 
_chemical_formula_moiety          'C36 H32 O6, 2(C H3 C N)' 
_chemical_formula_sum 
 'C40 H38 N2 O6' 
_chemical_formula_weight          642.72 
  
loop_ 
 _atom_type_symbol 
 _atom_type_description 
 _atom_type_scat_dispersion_real 
 _atom_type_scat_dispersion_imag 
 _atom_type_scat_source 
 'C'  'C'   0.0033   0.0016 
 'International Tables Vol C Tables 4.2.6.8 and 6.1.1.4' 
 'H'  'H'   0.0000   0.0000 
 'International Tables Vol C Tables 4.2.6.8 and 6.1.1.4' 
 'O'  'O'   0.0106   0.0060 
 'International Tables Vol C Tables 4.2.6.8 and 6.1.1.4' 
 'N'  'N'   0.0061   0.0033 
 'International Tables Vol C Tables 4.2.6.8 and 6.1.1.4' 
  
_symmetry_cell_setting            Triclinic 
_symmetry_space_group_name_H-M    P1 
  
loop_ 
 _symmetry_equiv_pos_as_xyz 
 'x, y, z' 
  
_cell_length_a                    9.822(2) 
_cell_length_b                    9.849(2) 
_cell_length_c                    10.995(3) 
_cell_angle_alpha                 95.962(4) 
_cell_angle_beta                  112.616(4) 
_cell_angle_gamma                 106.985(4) 
_cell_volume                      910.4(4) 
_cell_formula_units_Z             1 
_cell_measurement_temperature     173(2) 
_cell_measurement_reflns_used     4388 
_cell_measurement_theta_min       2.395 
_cell_measurement_theta_max       28.143 
  
_exptl_crystal_description        block 
_exptl_crystal_colour             colorless 
_exptl_crystal_size_max           0.20 
_exptl_crystal_size_mid           0.10 
_exptl_crystal_size_min           0.08 
_exptl_crystal_density_meas       ?
_exptl_crystal_density_diffrn     1.172 
_exptl_crystal_density_method     'not measured' 
_exptl_crystal_F_000              340 
_exptl_absorpt_coefficient_mu     0.079 
_exptl_absorpt_correction_type    multi-scan
_exptl_absorpt_correction_T_min   0.9844 
_exptl_absorpt_correction_T_max   0.9937 
_exptl_absorpt_process_details    SADABS 
  
_exptl_special_details 
; 
 ? 
; 
  
_diffrn_ambient_temperature       173(2) 
_diffrn_radiation_wavelength      0.71073 
_diffrn_radiation_type            MoK\a 
_diffrn_radiation_source          'fine-focus sealed tube' 
_diffrn_radiation_monochromator   graphite 
_diffrn_measurement_device_type   'CCD area detector' 
_diffrn_measurement_method        'phi and omega scans' 
_diffrn_reflns_number             8745 
_diffrn_reflns_av_R_equivalents   0.0131 
_diffrn_reflns_av_sigmaI/netI     0.0304 
_diffrn_reflns_limit_h_min        -13 
_diffrn_reflns_limit_h_max        13 
_diffrn_reflns_limit_k_min        -13 
_diffrn_reflns_limit_k_max        13 
_diffrn_reflns_limit_l_min        -14 
_diffrn_reflns_limit_l_max        14 
_diffrn_reflns_theta_min          2.07 
_diffrn_reflns_theta_max          28.33 
_reflns_number_total              7132 
_reflns_number_gt                 6670 
_reflns_threshold_expression      >2sigma(I) 
  
_computing_data_collection        'Bruker SMART' 
_computing_cell_refinement        'Bruker SMART' 
_computing_data_reduction         'Bruker SAINT' 
_computing_structure_solution     'SHELXS-97 (Sheldrick, 1990)' 
_computing_structure_refinement   'SHELXL-97 (Sheldrick, 1997)' 
_computing_molecular_graphics     'Bruker SHELXTL' 
_computing_publication_material   'Bruker SHELXTL' 
  
_refine_special_details 
; 
 Refinement of F^2^ against ALL reflections.  The weighted R-factor wR and 
 goodness of fit S are based on F^2^, conventional R-factors R are based 
 on F, with F set to zero for negative F^2^. The threshold expression of 
 F^2^ > 2sigma(F^2^) is used only for calculating R-factors(gt) etc. and is 
 not relevant to the choice of reflections for refinement.  R-factors based 
 on F^2^ are statistically about twice as large as those based on F, and R- 
 factors based on ALL data will be even larger. 
; 
  
_refine_ls_structure_factor_coef  Fsqd 
_refine_ls_matrix_type            full 
_refine_ls_weighting_scheme       calc 
_refine_ls_weighting_details 
 'calc w=1/[\s^2^(Fo^2^)+(0.0619P)^2^+0.1170P] where P=(Fo^2^+2Fc^2^)/3' 
_atom_sites_solution_primary      direct 
_atom_sites_solution_secondary    difmap 
_atom_sites_solution_hydrogens    geom 
_refine_ls_hydrogen_treatment     noref
_refine_ls_extinction_method      none 
_refine_ls_extinction_coef        ? 
_refine_ls_abs_structure_details 
 'Flack H D (1983), Acta Cryst. A39, 876-881' 
_refine_ls_abs_structure_Flack    -0.8(7) 
_refine_ls_number_reflns          7132 
_refine_ls_number_parameters      435 
_refine_ls_number_restraints      3 
_refine_ls_R_factor_all           0.0438 
_refine_ls_R_factor_gt            0.0407 
_refine_ls_wR_factor_ref          0.1099 
_refine_ls_wR_factor_gt           0.1067 
_refine_ls_goodness_of_fit_ref    1.027 
_refine_ls_restrained_S_all       1.027 
_refine_ls_shift/su_max           0.003 
_refine_ls_shift/su_mean          0.001 
  
loop_ 
 _atom_site_label 
 _atom_site_type_symbol 
 _atom_site_fract_x 
 _atom_site_fract_y 
 _atom_site_fract_z 
 _atom_site_U_iso_or_equiv 
 _atom_site_adp_type 
 _atom_site_occupancy 
 _atom_site_symmetry_multiplicity 
 _atom_site_calc_flag 
 _atom_site_refinement_flags 
 _atom_site_disorder_assembly 
 _atom_site_disorder_group 
C1 C 0.2183(2) -0.10461(19) 0.0769(2) 0.0403(4) Uani 1 1 d . . . 
H1 H 0.3273 -0.0811 0.1140 0.048 Uiso 1 1 calc R . . 
C2 C 0.1285(3) -0.1608(2) -0.0615(2) 0.0468(5) Uani 1 1 d . . . 
H2 H 0.1776 -0.1732 -0.1170 0.056 Uiso 1 1 calc R . . 
C3 C -0.0343(3) -0.1990(2) -0.1184(2) 0.0500(5) Uani 1 1 d . . . 
H3 H -0.0944 -0.2370 -0.2116 0.060 Uiso 1 1 calc R . . 
C4 C -0.1063(2) -0.1804(3) -0.0362(2) 0.0531(5) Uani 1 1 d . . . 
H4 H -0.2156 -0.2060 -0.0739 0.064 Uiso 1 1 calc R . . 
C5 C -0.0169(2) -0.1235(2) 0.1023(2) 0.0447(4) Uani 1 1 d . . . 
H5 H -0.0672 -0.1123 0.1570 0.054 Uiso 1 1 calc R . . 
C6 C 0.1473(2) -0.08268(17) 0.16173(18) 0.0328(3) Uani 1 1 d . . . 
C7 C 0.2381(2) -0.02029(17) 0.30922(17) 0.0307(3) Uani 1 1 d . . . 
H7 H 0.1807 -0.0264 0.3602 0.037 Uiso 1 1 calc R . . 
C8 C 0.39455(19) 0.04410(15) 0.37650(16) 0.0283(3) Uani 1 1 d . . . 
H8 H 0.4532 0.0508 0.3266 0.034 Uiso 1 1 calc R . . 
C9 C 0.48283(18) 0.10663(15) 0.52728(16) 0.0259(3) Uani 1 1 d . . . 
H9 H 0.4122 0.0675 0.5687 0.031 Uiso 1 1 calc R . . 
C10 C 0.62933(18) 0.06213(16) 0.58763(16) 0.0264(3) Uani 1 1 d . . . 
H10 H 0.6910 0.0852 0.5356 0.032 Uiso 1 1 calc R . . 
C11 C 0.57618(17) -0.10251(15) 0.57822(16) 0.0267(3) Uani 1 1 d . . . 
C12 C 0.8792(2) 0.1407(2) 0.7770(2) 0.0466(5) Uani 1 1 d . . . 
H12A H 0.9219 0.1566 0.7113 0.056 Uiso 1 1 calc R . . 
H12B H 0.8765 0.0457 0.7946 0.056 Uiso 1 1 calc R . . 
C13 C 0.9829(2) 0.25698(19) 0.90570(18) 0.0358(4) Uani 1 1 d . . . 
C14 C 0.9551(2) 0.3853(2) 0.93117(19) 0.0425(4) Uani 1 1 d . . . 
H14 H 0.8646 0.3964 0.8702 0.051 Uiso 1 1 calc R . . 
C15 C 1.0598(3) 0.4958(2) 1.0453(2) 0.0536(5) Uani 1 1 d . . . 
H15 H 1.0409 0.5818 1.0603 0.064 Uiso 1 1 calc R . . 
C16 C 1.1920(3) 0.4796(3) 1.1371(3) 0.0728(8) Uani 1 1 d . . . 
H16 H 1.2633 0.5549 1.2139 0.087 Uiso 1 1 calc R . . 
C17 C 1.1153(3) 0.2408(3) 1.0009(2) 0.0536(5) Uani 1 1 d . . . 
H17 H 1.1344 0.1546 0.9875 0.064 Uiso 1 1 calc R . . 
C18 C 1.2192(3) 0.3529(4) 1.1159(3) 0.0770(8) Uani 1 1 d . . . 
H18 H 1.3082 0.3418 1.1793 0.092 Uiso 1 1 calc R . . 
C19 C 0.8537(3) 0.5056(2) 0.3788(2) 0.0455(5) Uani 1 1 d . . . 
H19 H 0.7502 0.4508 0.3158 0.055 Uiso 1 1 calc R . . 
C20 C 0.9636(3) 0.5770(3) 0.3346(3) 0.0608(6) Uani 1 1 d . . . 
H20 H 0.9338 0.5687 0.2422 0.073 Uiso 1 1 calc R . . 
C21 C 1.1173(3) 0.6605(3) 0.4275(3) 0.0657(8) Uani 1 1 d . . . 
H21 H 1.1907 0.7084 0.3978 0.079 Uiso 1 1 calc R . . 
C22 C 1.1611(3) 0.6723(2) 0.5644(3) 0.0607(7) Uani 1 1 d . . . 
H22 H 1.2641 0.7290 0.6272 0.073 Uiso 1 1 calc R . . 
C23 C 1.0515(2) 0.59954(19) 0.6084(2) 0.0439(4) Uani 1 1 d . . . 
H23 H 1.0819 0.6073 0.7008 0.053 Uiso 1 1 calc R . . 
C24 C 0.8969(2) 0.51523(17) 0.51569(19) 0.0346(4) Uani 1 1 d . . . 
C25 C 0.7867(2) 0.43885(17) 0.56839(18) 0.0311(3) Uani 1 1 d . . . 
H25 H 0.8258 0.4572 0.6625 0.037 Uiso 1 1 calc R . . 
C26 C 0.63834(19) 0.34701(16) 0.49750(17) 0.0278(3) Uani 1 1 d . . . 
H26 H 0.5941 0.3256 0.4031 0.033 Uiso 1 1 calc R . . 
C27 C 0.53992(18) 0.27668(15) 0.56611(17) 0.0264(3) Uani 1 1 d . . . 
H27 H 0.6081 0.3090 0.6641 0.032 Uiso 1 1 calc R . . 
C28 C 0.3965(2) 0.32354(17) 0.5409(2) 0.0355(4) Uani 1 1 d . . . 
H28 H 0.3115 0.2716 0.4500 0.043 Uiso 1 1 calc R . . 
C29 C 0.44831(19) 0.48845(17) 0.55493(19) 0.0328(4) Uani 1 1 d . . . 
C30 C 0.1958(3) 0.2940(2) 0.6188(4) 0.0875(11) Uani 1 1 d . . . 
H30A H 0.1885 0.3797 0.5845 0.105 Uiso 1 1 calc R . . 
H30B H 0.1895 0.3070 0.7049 0.105 Uiso 1 1 calc R . . 
C31 C 0.0579(3) 0.1607(2) 0.5198(3) 0.0606(7) Uani 1 1 d . . . 
C32 C 0.0387(3) 0.0261(2) 0.5516(3) 0.0518(5) Uani 1 1 d . . . 
H32 H 0.1143 0.0185 0.6309 0.062 Uiso 1 1 calc R . . 
C33 C -0.0904(3) -0.0967(2) 0.4677(3) 0.0604(7) Uani 1 1 d . . . 
H33 H -0.1007 -0.1862 0.4908 0.072 Uiso 1 1 calc R . . 
C34 C -0.2017(4) -0.0886(4) 0.3528(3) 0.0785(9) Uani 1 1 d . . . 
H34 H -0.2894 -0.1717 0.2972 0.094 Uiso 1 1 calc R . . 
C35 C -0.1853(5) 0.0429(6) 0.3182(4) 0.1015(14) Uani 1 1 d . . . 
H35 H -0.2615 0.0489 0.2384 0.122 Uiso 1 1 calc R . . 
C36 C -0.0542(5) 0.1682(4) 0.4025(5) 0.0909(12) Uani 1 1 d . . . 
H36 H -0.0434 0.2572 0.3783 0.109 Uiso 1 1 calc R . . 
O1 O 0.52989(16) -0.18571(12) 0.46253(13) 0.0404(3) Uani 1 1 d . . . 
O2 O 0.57811(16) -0.14665(13) 0.68048(14) 0.0405(3) Uani 1 1 d . . . 
O3 O 0.72280(13) 0.14266(11) 0.72281(12) 0.0302(2) Uani 1 1 d . . . 
O4 O 0.43575(16) 0.53351(13) 0.45154(14) 0.0421(3) Uani 1 1 d . . . 
O5 O 0.50473(17) 0.57076(13) 0.67323(14) 0.0430(3) Uani 1 1 d . . . 
O6 O 0.34672(19) 0.28392(14) 0.64129(19) 0.0566(4) Uani 1 1 d . . . 
N1 N 0.5293(3) 0.2194(3) 1.1233(3) 0.0765(6) Uani 1 1 d . . . 
C38 C 0.5302(3) 0.1715(3) 1.0275(3) 0.0617(6) Uani 1 1 d . . . 
C37 C 0.5242(7) 0.1062(5) 0.9013(4) 0.1242(17) Uani 1 1 d . . . 
H37A H 0.4707 0.0021 0.8793 0.186 Uiso 1 1 calc R . . 
H37B H 0.6298 0.1273 0.9101 0.186 Uiso 1 1 calc R . . 
H37C H 0.4680 0.1456 0.8303 0.186 Uiso 1 1 calc R . . 
N2 N 0.4630(5) 0.7602(4) 0.9535(4) 0.1195(13) Uani 1 1 d . . . 
C39 C 0.4852(4) 0.6594(4) 0.9664(3) 0.0791(8) Uani 1 1 d . . . 
C40 C 0.5205(8) 0.5291(5) 0.9841(5) 0.1309(17) Uani 1 1 d . . . 
H40A H 0.5260 0.4861 0.9045 0.196 Uiso 1 1 calc R . . 
H40B H 0.4388 0.4605 0.9980 0.196 Uiso 1 1 calc R . . 
H40C H 0.6202 0.5536 1.0617 0.196 Uiso 1 1 calc R . . 
  
loop_ 
 _atom_site_aniso_label 
 _atom_site_aniso_U_11 
 _atom_site_aniso_U_22 
 _atom_site_aniso_U_33 
 _atom_site_aniso_U_23 
 _atom_site_aniso_U_13 
 _atom_site_aniso_U_12 
C1 0.0377(9) 0.0322(8) 0.0432(10) -0.0013(8) 0.0160(8) 0.0080(7) 
C2 0.0556(12) 0.0391(10) 0.0413(11) -0.0003(8) 0.0221(9) 0.0134(9) 
C3 0.0552(12) 0.0416(10) 0.0375(11) 0.0018(9) 0.0090(9) 0.0143(9) 
C4 0.0353(10) 0.0572(13) 0.0472(12) 0.0011(10) 0.0048(9) 0.0122(9) 
C5 0.0367(9) 0.0485(11) 0.0441(11) 0.0059(9) 0.0152(8) 0.0142(8) 
C6 0.0339(8) 0.0214(7) 0.0362(9) 0.0029(6) 0.0119(7) 0.0067(6) 
C7 0.0344(8) 0.0242(7) 0.0342(9) 0.0065(6) 0.0165(7) 0.0097(6) 
C8 0.0346(8) 0.0182(6) 0.0341(8) 0.0064(6) 0.0177(7) 0.0083(6) 
C9 0.0301(7) 0.0157(6) 0.0331(8) 0.0070(6) 0.0161(6) 0.0063(6) 
C10 0.0299(7) 0.0162(6) 0.0319(8) 0.0037(6) 0.0152(6) 0.0050(6) 
C11 0.0268(7) 0.0194(6) 0.0341(8) 0.0054(6) 0.0132(6) 0.0088(6) 
C12 0.0356(9) 0.0349(9) 0.0518(12) -0.0085(8) 0.0048(8) 0.0147(8) 
C13 0.0344(8) 0.0297(8) 0.0354(9) 0.0057(7) 0.0120(7) 0.0060(7) 
C14 0.0510(11) 0.0337(9) 0.0331(10) 0.0070(7) 0.0098(8) 0.0139(8) 
C15 0.0701(15) 0.0361(10) 0.0421(12) 0.0006(9) 0.0174(11) 0.0148(10) 
C16 0.0671(16) 0.0693(16) 0.0423(13) -0.0163(12) -0.0047(11) 0.0199(13) 
C17 0.0488(12) 0.0520(12) 0.0508(12) 0.0069(10) 0.0101(10) 0.0235(10) 
C18 0.0593(15) 0.091(2) 0.0503(15) -0.0039(14) -0.0069(12) 0.0352(15) 
C19 0.0527(11) 0.0368(9) 0.0556(13) 0.0171(9) 0.0337(10) 0.0122(9) 
C20 0.0770(16) 0.0549(13) 0.0830(18) 0.0352(13) 0.0593(15) 0.0286(12) 
C21 0.0659(15) 0.0460(12) 0.128(2) 0.0413(14) 0.0750(17) 0.0282(11) 
C22 0.0379(10) 0.0327(10) 0.121(2) 0.0181(12) 0.0443(13) 0.0121(8) 
C23 0.0339(9) 0.0307(8) 0.0682(13) 0.0088(9) 0.0252(9) 0.0103(7) 
C24 0.0344(8) 0.0215(7) 0.0532(11) 0.0092(7) 0.0251(8) 0.0090(6) 
C25 0.0334(8) 0.0239(7) 0.0356(9) 0.0075(6) 0.0165(7) 0.0077(6) 
C26 0.0339(8) 0.0190(6) 0.0318(8) 0.0071(6) 0.0160(6) 0.0091(6) 
C27 0.0300(7) 0.0166(6) 0.0324(8) 0.0056(6) 0.0153(6) 0.0061(6) 
C28 0.0341(8) 0.0181(7) 0.0567(11) 0.0074(7) 0.0237(8) 0.0077(6) 
C29 0.0298(7) 0.0198(7) 0.0478(10) 0.0060(7) 0.0161(7) 0.0095(6) 
C30 0.0810(18) 0.0278(9) 0.190(3) 0.0121(14) 0.102(2) 0.0152(11) 
C31 0.0672(14) 0.0364(10) 0.121(2) 0.0310(12) 0.0729(16) 0.0299(10) 
C32 0.0536(12) 0.0333(9) 0.0859(17) 0.0164(10) 0.0458(12) 0.0179(9) 
C33 0.0600(14) 0.0390(10) 0.097(2) 0.0109(12) 0.0537(15) 0.0142(10) 
C34 0.0612(16) 0.095(2) 0.088(2) 0.0032(18) 0.0428(16) 0.0318(16) 
C35 0.098(3) 0.167(4) 0.098(3) 0.058(3) 0.062(2) 0.094(3) 
C36 0.118(3) 0.086(2) 0.157(4) 0.074(2) 0.107(3) 0.077(2) 
O1 0.0546(8) 0.0208(5) 0.0419(7) 0.0021(5) 0.0201(6) 0.0113(5) 
O2 0.0528(8) 0.0237(5) 0.0415(7) 0.0109(5) 0.0201(6) 0.0085(5) 
O3 0.0308(5) 0.0202(5) 0.0340(6) 0.0021(4) 0.0114(5) 0.0068(4) 
O4 0.0488(7) 0.0235(5) 0.0429(8) 0.0059(5) 0.0099(6) 0.0122(5) 
O5 0.0581(8) 0.0228(5) 0.0461(8) 0.0055(5) 0.0243(7) 0.0110(6) 
O6 0.0705(10) 0.0271(6) 0.1034(13) 0.0188(7) 0.0693(10) 0.0164(6) 
N1 0.0828(17) 0.0734(15) 0.0641(14) 0.0015(12) 0.0344(13) 0.0176(13) 
C38 0.0735(16) 0.0524(13) 0.0695(17) 0.0209(12) 0.0422(14) 0.0197(12) 
C37 0.228(5) 0.106(3) 0.103(3) 0.042(2) 0.119(4) 0.078(3) 
N2 0.143(3) 0.107(2) 0.175(4) 0.062(3) 0.109(3) 0.074(2) 
C39 0.088(2) 0.0765(19) 0.086(2) 0.0285(17) 0.0482(18) 0.0311(17) 
C40 0.204(5) 0.092(3) 0.113(3) 0.047(3) 0.073(4) 0.063(3) 
  
_geom_special_details 
; 
 All esds (except the esd in the dihedral angle between two l.s. planes) 
 are estimated using the full covariance matrix.  The cell esds are taken 
 into account individually in the estimation of esds in distances, angles 
 and torsion angles; correlations between esds in cell parameters are only 
 used when they are defined by crystal symmetry.  An approximate (isotropic) 
 treatment of cell esds is used for estimating esds involving l.s. planes. 
; 
  
loop_ 
 _geom_bond_atom_site_label_1 
 _geom_bond_atom_site_label_2 
 _geom_bond_distance 
 _geom_bond_site_symmetry_2 
 _geom_bond_publ_flag 
C1 C2 1.381(3) . ? 
C1 C6 1.396(2) . ? 
C1 H1 0.9300 . ? 
C2 C3 1.386(3) . ? 
C2 H2 0.9300 . ? 
C3 C4 1.372(3) . ? 
C3 H3 0.9300 . ? 
C4 C5 1.383(3) . ? 
C4 H4 0.9300 . ? 
C5 C6 1.395(3) . ? 
C5 H5 0.9300 . ? 
C6 C7 1.471(2) . ? 
C7 C8 1.330(2) . ? 
C7 H7 0.9300 . ? 
C8 C9 1.500(2) . ? 
C8 H8 0.9300 . ? 
C9 C10 1.548(2) . ? 
C9 C27 1.5558(19) . ? 
C9 H9 0.9800 . ? 
C10 O3 1.400(2) . ? 
C10 C11 1.530(2) . ? 
C10 H10 0.9800 . ? 
C11 O2 1.242(2) . ? 
C11 O1 1.272(2) . ? 
C12 O3 1.425(2) . ? 
C12 C13 1.492(3) . ? 
C12 H12A 0.9700 . ? 
C12 H12B 0.9700 . ? 
C13 C17 1.387(3) . ? 
C13 C14 1.392(2) . ? 
C14 C15 1.373(3) . ? 
C14 H14 0.9300 . ? 
C15 C16 1.371(4) . ? 
C15 H15 0.9300 . ? 
C16 C18 1.366(4) . ? 
C16 H16 0.9300 . ? 
C17 C18 1.385(4) . ? 
C17 H17 0.9300 . ? 
C18 H18 0.9300 . ? 
C19 C24 1.382(3) . ? 
C19 C20 1.388(3) . ? 
C19 H19 0.9300 . ? 
C20 C21 1.383(4) . ? 
C20 H20 0.9300 . ? 
C21 C22 1.378(4) . ? 
C21 H21 0.9300 . ? 
C22 C23 1.389(3) . ? 
C22 H22 0.9300 . ? 
C23 C24 1.390(3) . ? 
C23 H23 0.9300 . ? 
C24 C25 1.473(2) . ? 
C25 C26 1.326(2) . ? 
C25 H25 0.9300 . ? 
C26 C27 1.504(2) . ? 
C26 H26 0.9300 . ? 
C27 C28 1.543(2) . ? 
C27 H27 0.9800 . ? 
C28 O6 1.415(2) . ? 
C28 C29 1.525(2) . ? 
C28 H28 0.9800 . ? 
C29 O4 1.238(2) . ? 
C29 O5 1.273(2) . ? 
C30 O6 1.441(3) . ? 
C30 C31 1.508(4) . ? 
C30 H30A 0.9700 . ? 
C30 H30B 0.9700 . ? 
C31 C36 1.363(5) . ? 
C31 C32 1.384(3) . ? 
C32 C33 1.376(3) . ? 
C32 H32 0.9300 . ? 
C33 C34 1.345(4) . ? 
C33 H33 0.9300 . ? 
C34 C35 1.369(6) . ? 
C34 H34 0.9300 . ? 
C35 C36 1.399(6) . ? 
C35 H35 0.9300 . ? 
C36 H36 0.9300 . ? 
N1 C38 1.113(3) . ? 
C38 C37 1.439(4) . ? 
C37 H37A 0.9601 . ? 
C37 H37B 0.9601 . ? 
C37 H37C 0.9601 . ? 
N2 C39 1.088(4) . ? 
C39 C40 1.438(5) . ? 
C40 H40A 0.9600 . ? 
C40 H40B 0.9600 . ? 
C40 H40C 0.9600 . ? 
  
loop_ 
 _geom_angle_atom_site_label_1 
 _geom_angle_atom_site_label_2 
 _geom_angle_atom_site_label_3 
 _geom_angle 
 _geom_angle_site_symmetry_1 
 _geom_angle_site_symmetry_3 
 _geom_angle_publ_flag 
C2 C1 C6 120.69(18) . . ? 
C2 C1 H1 119.7 . . ? 
C6 C1 H1 119.7 . . ? 
C1 C2 C3 120.52(19) . . ? 
C1 C2 H2 119.7 . . ? 
C3 C2 H2 119.7 . . ? 
C4 C3 C2 119.57(19) . . ? 
C4 C3 H3 120.2 . . ? 
C2 C3 H3 120.2 . . ? 
C3 C4 C5 120.16(19) . . ? 
C3 C4 H4 119.9 . . ? 
C5 C4 H4 119.9 . . ? 
C4 C5 C6 121.33(18) . . ? 
C4 C5 H5 119.3 . . ? 
C6 C5 H5 119.3 . . ? 
C5 C6 C1 117.71(17) . . ? 
C5 C6 C7 119.50(16) . . ? 
C1 C6 C7 122.79(16) . . ? 
C8 C7 C6 126.07(15) . . ? 
C8 C7 H7 117.0 . . ? 
C6 C7 H7 117.0 . . ? 
C7 C8 C9 124.47(14) . . ? 
C7 C8 H8 117.8 . . ? 
C9 C8 H8 117.8 . . ? 
C8 C9 C10 110.79(11) . . ? 
C8 C9 C27 112.28(12) . . ? 
C10 C9 C27 108.18(12) . . ? 
C8 C9 H9 108.5 . . ? 
C10 C9 H9 108.5 . . ? 
C27 C9 H9 108.5 . . ? 
O3 C10 C11 111.05(13) . . ? 
O3 C10 C9 108.84(11) . . ? 
C11 C10 C9 109.81(12) . . ? 
O3 C10 H10 109.0 . . ? 
C11 C10 H10 109.0 . . ? 
C9 C10 H10 109.0 . . ? 
O2 C11 O1 124.36(14) . . ? 
O2 C11 C10 119.38(14) . . ? 
O1 C11 C10 116.26(14) . . ? 
O3 C12 C13 110.38(14) . . ? 
O3 C12 H12A 109.6 . . ? 
C13 C12 H12A 109.6 . . ? 
O3 C12 H12B 109.6 . . ? 
C13 C12 H12B 109.6 . . ? 
H12A C12 H12B 108.1 . . ? 
C17 C13 C14 118.46(17) . . ? 
C17 C13 C12 119.44(17) . . ? 
C14 C13 C12 122.03(16) . . ? 
C15 C14 C13 120.80(18) . . ? 
C15 C14 H14 119.6 . . ? 
C13 C14 H14 119.6 . . ? 
C14 C15 C16 120.1(2) . . ? 
C14 C15 H15 120.0 . . ? 
C16 C15 H15 120.0 . . ? 
C18 C16 C15 120.0(2) . . ? 
C18 C16 H16 120.0 . . ? 
C15 C16 H16 120.0 . . ? 
C18 C17 C13 120.0(2) . . ? 
C18 C17 H17 120.0 . . ? 
C13 C17 H17 120.0 . . ? 
C16 C18 C17 120.6(2) . . ? 
C16 C18 H18 119.7 . . ? 
C17 C18 H18 119.7 . . ? 
C24 C19 C20 120.5(2) . . ? 
C24 C19 H19 119.7 . . ? 
C20 C19 H19 119.7 . . ? 
C21 C20 C19 120.2(2) . . ? 
C21 C20 H20 119.9 . . ? 
C19 C20 H20 119.9 . . ? 
C22 C21 C20 119.73(19) . . ? 
C22 C21 H21 120.1 . . ? 
C20 C21 H21 120.1 . . ? 
C21 C22 C23 120.0(2) . . ? 
C21 C22 H22 120.0 . . ? 
C23 C22 H22 120.0 . . ? 
C22 C23 C24 120.7(2) . . ? 
C22 C23 H23 119.7 . . ? 
C24 C23 H23 119.7 . . ? 
C19 C24 C23 118.82(17) . . ? 
C19 C24 C25 123.00(17) . . ? 
C23 C24 C25 118.17(17) . . ? 
C26 C25 C24 127.65(17) . . ? 
C26 C25 H25 116.2 . . ? 
C24 C25 H25 116.2 . . ? 
C25 C26 C27 121.59(15) . . ? 
C25 C26 H26 119.2 . . ? 
C27 C26 H26 119.2 . . ? 
C26 C27 C28 113.57(13) . . ? 
C26 C27 C9 112.57(12) . . ? 
C28 C27 C9 109.40(12) . . ? 
C26 C27 H27 107.0 . . ? 
C28 C27 H27 107.0 . . ? 
C9 C27 H27 107.0 . . ? 
O6 C28 C29 111.45(14) . . ? 
O6 C28 C27 105.67(14) . . ? 
C29 C28 C27 109.02(13) . . ? 
O6 C28 H28 110.2 . . ? 
C29 C28 H28 110.2 . . ? 
C27 C28 H28 110.2 . . ? 
O4 C29 O5 124.38(15) . . ? 
O4 C29 C28 118.10(16) . . ? 
O5 C29 C28 117.50(16) . . ? 
O6 C30 C31 112.88(16) . . ? 
O6 C30 H30A 109.0 . . ? 
C31 C30 H30A 109.0 . . ? 
O6 C30 H30B 109.0 . . ? 
C31 C30 H30B 109.0 . . ? 
H30A C30 H30B 107.8 . . ? 
C36 C31 C32 118.2(3) . . ? 
C36 C31 C30 122.5(3) . . ? 
C32 C31 C30 119.2(3) . . ? 
C33 C32 C31 121.0(3) . . ? 
C33 C32 H32 119.5 . . ? 
C31 C32 H32 119.5 . . ? 
C34 C33 C32 120.7(3) . . ? 
C34 C33 H33 119.7 . . ? 
C32 C33 H33 119.7 . . ? 
C33 C34 C35 119.6(3) . . ? 
C33 C34 H34 120.2 . . ? 
C35 C34 H34 120.2 . . ? 
C34 C35 C36 120.2(3) . . ? 
C34 C35 H35 119.9 . . ? 
C36 C35 H35 119.9 . . ? 
C31 C36 C35 120.3(3) . . ? 
C31 C36 H36 119.8 . . ? 
C35 C36 H36 119.8 . . ? 
C10 O3 C12 113.49(12) . . ? 
C28 O6 C30 113.7(2) . . ? 
N1 C38 C37 177.5(4) . . ? 
C38 C37 H37A 109.5 . . ? 
C38 C37 H37B 109.5 . . ? 
H37A C37 H37B 109.5 . . ? 
C38 C37 H37C 109.5 . . ? 
H37A C37 H37C 109.5 . . ? 
H37B C37 H37C 109.5 . . ? 
N2 C39 C40 177.9(5) . . ? 
C39 C40 H40A 109.5 . . ? 
C39 C40 H40B 109.5 . . ? 
H40A C40 H40B 109.5 . . ? 
C39 C40 H40C 109.5 . . ? 
H40A C40 H40C 109.5 . . ? 
H40B C40 H40C 109.5 . . ? 
  
loop_ 
 _geom_torsion_atom_site_label_1 
 _geom_torsion_atom_site_label_2 
 _geom_torsion_atom_site_label_3 
 _geom_torsion_atom_site_label_4 
 _geom_torsion 
 _geom_torsion_site_symmetry_1 
 _geom_torsion_site_symmetry_2 
 _geom_torsion_site_symmetry_3 
 _geom_torsion_site_symmetry_4 
 _geom_torsion_publ_flag 
C6 C1 C2 C3 -1.2(3) . . . . ? 
C1 C2 C3 C4 0.1(3) . . . . ? 
C2 C3 C4 C5 0.1(3) . . . . ? 
C3 C4 C5 C6 0.6(3) . . . . ? 
C4 C5 C6 C1 -1.6(3) . . . . ? 
C4 C5 C6 C7 178.92(18) . . . . ? 
C2 C1 C6 C5 1.9(3) . . . . ? 
C2 C1 C6 C7 -178.67(17) . . . . ? 
C5 C6 C7 C8 -168.81(17) . . . . ? 
C1 C6 C7 C8 11.8(3) . . . . ? 
C6 C7 C8 C9 179.94(14) . . . . ? 
C7 C8 C9 C10 135.33(15) . . . . ? 
C7 C8 C9 C27 -103.59(16) . . . . ? 
C8 C9 C10 O3 169.79(12) . . . . ? 
C27 C9 C10 O3 46.32(16) . . . . ? 
C8 C9 C10 C11 -68.46(15) . . . . ? 
C27 C9 C10 C11 168.07(12) . . . . ? 
O3 C10 C11 O2 20.07(19) . . . . ? 
C9 C10 C11 O2 -100.35(17) . . . . ? 
O3 C10 C11 O1 -161.02(13) . . . . ? 
C9 C10 C11 O1 78.56(16) . . . . ? 
O3 C12 C13 C17 154.99(19) . . . . ? 
O3 C12 C13 C14 -28.0(3) . . . . ? 
C17 C13 C14 C15 2.5(3) . . . . ? 
C12 C13 C14 C15 -174.5(2) . . . . ? 
C13 C14 C15 C16 -1.2(4) . . . . ? 
C14 C15 C16 C18 -0.6(5) . . . . ? 
C14 C13 C17 C18 -2.1(4) . . . . ? 
C12 C13 C17 C18 175.0(2) . . . . ? 
C15 C16 C18 C17 1.0(5) . . . . ? 
C13 C17 C18 C16 0.4(5) . . . . ? 
C24 C19 C20 C21 -0.9(3) . . . . ? 
C19 C20 C21 C22 0.1(3) . . . . ? 
C20 C21 C22 C23 0.5(3) . . . . ? 
C21 C22 C23 C24 -0.5(3) . . . . ? 
C20 C19 C24 C23 1.0(3) . . . . ? 
C20 C19 C24 C25 -178.34(18) . . . . ? 
C22 C23 C24 C19 -0.3(2) . . . . ? 
C22 C23 C24 C25 179.07(16) . . . . ? 
C19 C24 C25 C26 3.7(3) . . . . ? 
C23 C24 C25 C26 -175.71(16) . . . . ? 
C24 C25 C26 C27 179.83(14) . . . . ? 
C25 C26 C27 C28 115.23(17) . . . . ? 
C25 C26 C27 C9 -119.76(16) . . . . ? 
C8 C9 C27 C26 -55.23(16) . . . . ? 
C10 C9 C27 C26 67.34(16) . . . . ? 
C8 C9 C27 C28 72.03(16) . . . . ? 
C10 C9 C27 C28 -165.40(13) . . . . ? 
C26 C27 C28 O6 -163.28(13) . . . . ? 
C9 C27 C28 O6 70.02(16) . . . . ? 
C26 C27 C28 C29 -43.39(19) . . . . ? 
C9 C27 C28 C29 -170.08(14) . . . . ? 
O6 C28 C29 O4 -152.38(16) . . . . ? 
C27 C28 C29 O4 91.37(19) . . . . ? 
O6 C28 C29 O5 29.0(2) . . . . ? 
C27 C28 C29 O5 -87.24(18) . . . . ? 
O6 C30 C31 C36 -121.1(3) . . . . ? 
O6 C30 C31 C32 62.4(3) . . . . ? 
C36 C31 C32 C33 -0.4(3) . . . . ? 
C30 C31 C32 C33 176.27(18) . . . . ? 
C31 C32 C33 C34 -0.3(3) . . . . ? 
C32 C33 C34 C35 0.8(3) . . . . ? 
C33 C34 C35 C36 -0.6(4) . . . . ? 
C32 C31 C36 C35 0.7(4) . . . . ? 
C30 C31 C36 C35 -175.9(2) . . . . ? 
C34 C35 C36 C31 -0.2(4) . . . . ? 
C11 C10 O3 C12 74.93(17) . . . . ? 
C9 C10 O3 C12 -164.08(14) . . . . ? 
C13 C12 O3 C10 165.48(15) . . . . ? 
C29 C28 O6 C30 72.7(2) . . . . ? 
C27 C28 O6 C30 -169.01(15) . . . . ? 
C31 C30 O6 C28 82.8(3) . . . . ? 
  
_diffrn_measured_fraction_theta_max    0.974 
_diffrn_reflns_theta_full              28.33 
_diffrn_measured_fraction_theta_full   0.974 
_refine_diff_density_max    0.289 
_refine_diff_density_min   -0.161 
_refine_diff_density_rms    0.036 
